# Supplementary material for: Development and evaluation of an efficient and real-time monitoring system for the vector mosquitoes, Aedes albopictus and Culex quinquefasciatus
Source: PubMed Central journal article supplement (PMC9455839; doi:10.1371/journal.pntd.0010701), 2022-09-08

**A. *Aedes albopictus* ♂**

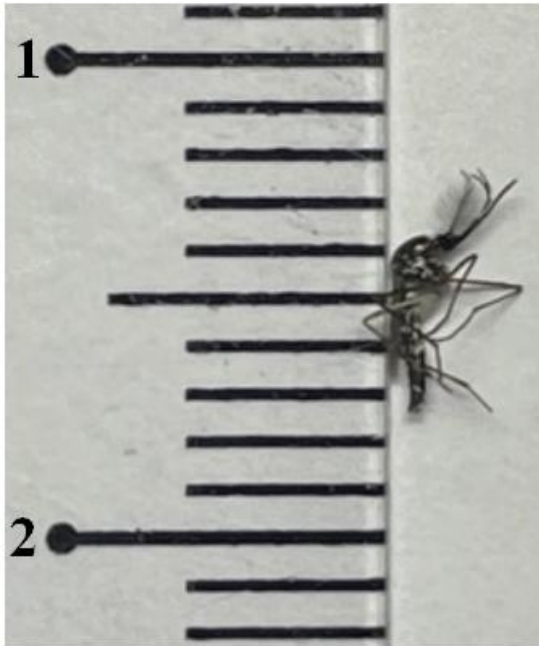

**B. *Aedes albopictus* ♀**

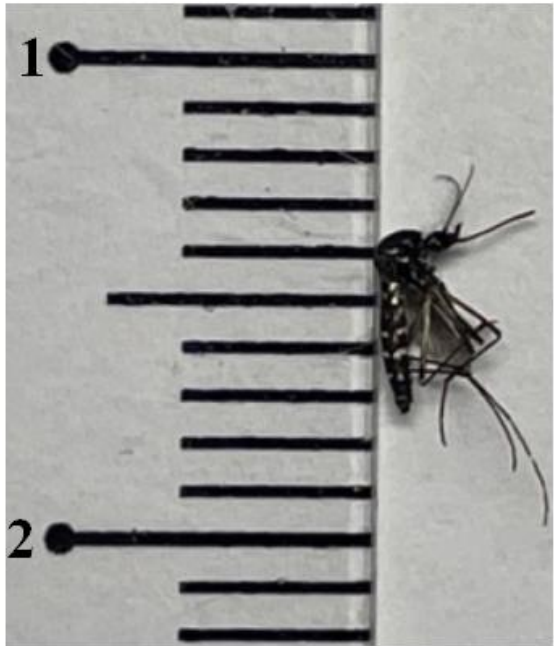

**C. *Culex quinquefasciatus* ♂**

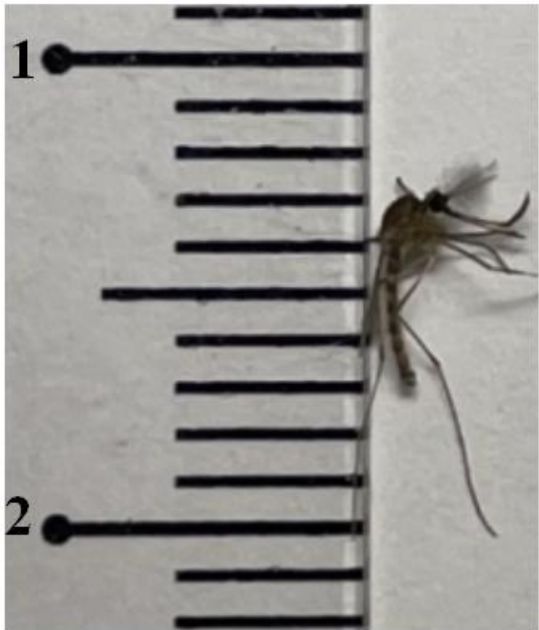

**D. *Culex quinquefasciatus* ♀**

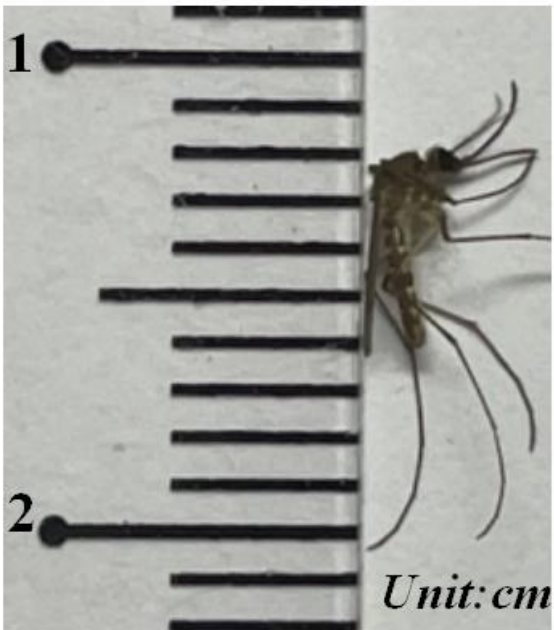

Supplement: pntd.0010701.s001.pdf [file pntd.0010701.s001.pdf]
